# Supplementary material
Source: publisher site journal article supplement (https://www.spandidos-publications.com/8588/downloadSupplementary)
Supplement: Supplementary file 1 [file downloadSupplementary]

Table SI. Duplex RNA sequences for PON1 siRNA.

| siRNA | Duplex RNA sequence, 5'→3'         |
|-------|------------------------------------|
| PON1  | Forward: GCUCUGGAUAAAAGUAUCCUGGAAU |
|       | Reverse: AUUCCAGGAUACUUUAAUCCAGAGC |
| NC    | Forward: ACCCAGAUUUUUUAUCGCGU      |
|       | Reverse: ACGCGAUAAAAUAUCUGGGUCG    |

PON1, paraoxonase 1; si, small interfering; NC, negative control.

Table SII. Sequences for reverse transcription-quantitative PCR.

| Gene          | Species | Sequence                         |
|---------------|---------|----------------------------------|
| MCP-1         | Mouse   | F: 5'-AGCCAACTCTCACTGAAGCC-3'    |
|               |         | R: 5'-GCGTAACTGCATCTGGCTG-3'     |
| TNF- $\alpha$ | Mouse   | F: 5'-GTCCCAAAGGGATGAGAAGT-3'    |
|               |         | R: 5'-TTTGCTACGACGTGGGCTAC-3'    |
| IL-1 $\beta$  | Mouse   | F: 5'-TGCCACCTTTTGACAGTGATG-3'   |
|               |         | R: 5'-CAAAGGTTTGAAGCAGCCC-3'     |
| Foxp3         | Mouse   | F: 5'-AGAAGACAGACCCATGCTGTG-3'   |
|               |         | R: 5'-GTCAGAGGCAGGCTGGATAA-3'    |
| CD19          | Mouse   | F: 5'-TTGGGGGTCTCTTCTGCTTC-3'    |
|               |         | R: 5'-TCATTCGCTTCCTTTTCCTTC-3'   |
| CD20          | Mouse   | F: 5'-TGATCTCAGCTGTGAGTGGC-3'    |
|               |         | R: 5'-ATGATTTGGACAGCCCCAA-3'     |
| CD21          | Mouse   | F: 5'-AGGCTCACAACCTCACAGAGC-3'   |
|               |         | R: 5'-GCAGCAACTTACACTGACCAAG-3'  |
| CD22          | Mouse   | F: 5'-ACAGGAGGAAACAGGCTTTCTG-3'  |
|               |         | R: 5'-TGTGGCGTTGTACAGGACAG-3'    |
| CD24          | Mouse   | F: 5'-GAGCATACTCACGGCTGGG-3'     |
|               |         | R: 5'-TTGGTTGCAGTAAATCTGCGT-3'   |
| Pon1          | Mouse   | F: 5'-GGTCTGTCGTGGTCCAATGT-3'    |
|               |         | R: 5'-TGGATTCGAAGCACCTCTGA-3'    |
| GAPDH         | Mouse   | F: 5'-AACCCTTAAGAGGGATGCTGC-3'   |
|               |         | R: 5'-CCCAATACGGCCAAATCCGT-3'    |
| MCP-1         | Human   | F: 5'-TCTGTGCCTGCTGCTCATAG-3'    |
|               |         | R: 5'-GGGCATTGATTGCATCTGGC-3'    |
| TNF- $\alpha$ | Human   | F: 5'-CTCGAACCCCGAGTGACAAG-3'    |
|               |         | R: 5'-TGAGGTACAGGCCCTCTGAT-3'    |
| IL-1 $\beta$  | Human   | F: 5'-CTGTCGTGCGTGTGAAAGA-3'     |
|               |         | R: 5'-TTCTGCTTGAGAGGTGCTGA-3'    |
| Pon1          | Human   | F: 5'-TATTGTTGCTGTGGGACCTGAG-3'  |
|               |         | R: 5'-CACGCTAAACCCAAATACATCTC-3' |
| IL-6          | Human   | F: 5'-CGGGAACGAAAGAGAAGCTC-3'    |
|               |         | R: 5'-CCGAAGGCGCTTGTGGA-3'       |
| GAPDH         | Human   | F: 5'-AGGTCCGAGTCAACGGATTTG-3'   |
|               |         | R: 5'-TGATGACCCTTTTGGCTCCC-3'    |

MCP, monocyte chemoattractant protein; Pon, paraoxonase; F, forward; R, reverse.

Table SIII. Gene signatures for connectivity map query.

| Downregulated | Upregulated |
|---------------|-------------|
| JUNB          | RPS17       |
| FOS           | DONSON      |
| DUSP1         | UQCR11      |
| JUN           | IFI44L      |
| PTPRCAP       | SNU13       |
| CD69          | TCL1A       |
| TSC22D3       | JCHAIN      |
| GLTSCR2       | NDUFB8      |
| PPP1R15A      | ISG15       |
| ZFP36         | VPREB3      |
| CXCR4         | S100A8      |
| FOSB          | PSMA2       |
| NFKBIA        | S100A9      |
| IER2          | SARAF       |
| CD83          | TMBIM4      |
| RGS1          | LSM8        |
| NR4A2         | RSRP1       |
| RPS2          | FCMR        |
| FTH1          | CD79B       |
| YPEL5         | XAF1        |
| RGS2          | SUB1        |
| KLF6          | SNRPN       |
| BTG1          | RBX1        |
| RPL17         | IFI16       |
| ZFP36L2       | IFITM2      |
| YBX1          | MX1         |
| TUBA1A        | RPL28       |
| ZNF331        | CD72        |
| PNRC1         | RPS24       |
| EIF1          | MEF2C       |
| HNRNPA0       | IKZF3       |
| RPL13         | MRPL57      |
| HERPUD1       | OAS1        |
| PFN1          | ISG20       |
| SLC2A3        | CLEC2D      |
| EIF4A1        | CBX3        |
| EEF2          | RPL37A      |
| BTG2          | PLAC8       |
| RPS26         | SEC62       |
| KRT10         | STX7        |
| CYBA          | NMT1        |
| ARL4A         | RPL38       |
| EIF3F         | IFI6        |

|          |         |
|----------|---------|
| SIK1     | FRG1    |
| CHMP1B   | ATP5E   |
| IDS      | RPS21   |
| SNX29P2  | NOP10   |
| MARCKSL1 | MRPS18C |
| CMPK1    | DDX24   |
| DDX5     | BST2    |
| DUSP2    | UQCR10  |
| POLD4    | TBCA    |
| SERP1    | NSA2    |
| MATR3    | LUC7L3  |
| PMAIP1   | NDUFA3  |
| ATP5D    | DBI     |
| LTB      | IER3IP1 |
| ITM2B    | METAP2  |
| CCNI     | PSMB9   |
| PCBP2    | COX6B1  |
| RNASET2  | ACVR2B  |
| U2AF1    | EIF2S2  |
| COTL1    | SAMD9   |
| GPR183   | RPS27L  |
| ACTB     | DDX18   |
| RNF139   | MX2     |
| IRF1     | UPF2    |
| VAMP2    | IFI44   |
| MIF      | NDUFB1  |
| UBC      | TIMM8B  |
| HMGN1    | RPS12   |
| EIF4B    | LARP7   |
| CD55     | GLRX    |
| STK17A   | SLIRP   |
| SNX3     | TRIM38  |
| CD44     | RPS29   |
| EIF3L    | CAPZA1  |
| ARF6     | RPL37   |
| PABPC1   | DYNC112 |
| AES      | RALGPS2 |
| FAM46C   | EIF5B   |
| HLA-DQB1 | MRPS18B |
| EEF1A1   | IFI27   |
| GTF3A    | IFITM3  |
| PPDPF    | FAU     |
| CYTIP    | MZB1    |
| ODC1     | MS4A1   |
| CCNL1    | POU2F2  |

|           |         |
|-----------|---------|
| LAPTM5    | RPL36   |
| CHPT1     | NMI     |
| GNLY      | POMP    |
| GADD45B   | CDC40   |
| EIF4G2    | NRDC    |
| PDIA3     | TMSB10  |
| KLF2      | PCDH9   |
| TSPAN13   | RSRC1   |
| SF1       | EIF2AK2 |
| DNAJB9    | COX7C   |
| FCER2     | CD81    |
| CYCS      | MYL12A  |
| LY9       | ERICH1  |
| DDIT4     | PIN4    |
| NOTCH2NL  | MNDA    |
| SIAH2     | IFIT3   |
| KDM6B     | TNFSF10 |
| KLF3      | GSTP1   |
| ARHGAP24  | PAX5    |
| PRKAR1A   | AP2B1   |
| RPL4      | CD180   |
| HIST1H2BK | RPS23   |
| ZBTB1     | EIF3J   |
| S100A10   | RPL12   |
| HES1      | RPS28   |
| ANXA11    | CCDC186 |
| HNRNPA1   | RPLP1   |
| TERF2IP   | STAT1   |
| CD74      | CSF3R   |
| MYLIP     | RPL35   |
| RHOB      | PLSCR1  |
| TUFM      | MTERF4  |
| SUN2      | TMA16   |
| TSPYL1    | MAP7D3  |
| SFPQ      | TRIM22  |
| SOCS3     | RAB29   |
| ISCU      | RPL22   |
| JAK1      | USP18   |
| MAPK1IP1L | RPLP2   |
| NXT1      | RPS15A  |
| NR4A1     | TCL1B   |
| JTB       | PPP4R3A |
| IL4R      | APOLD1  |
| IFRD1     | POLR3K  |
| MAP3K8    | RPL39   |
| H3F3B     | IFIT1   |

|          |          |
|----------|----------|
| STK17B   | RPL24    |
| CRIP1    | PUM3     |
| UBE2D2   | TAP2     |
| HLA-DPA1 | KNOP1    |
| PIM2     | RPL29    |
| PTP4A1   | OAS2     |
| ARL6IP4  | SRPRA    |
| SCAND1   | MYDGF    |
| CSDE1    | RPS25    |
| EZR      | HIST1H1E |
| EIF4A2   | PPP4R3B  |
| HLA-DRA  | RPS27    |
| DNAJB1   | CETN3    |
| TAGLN2   | NDUFA7   |
| SLC25A6  | PRELID3B |
| MRPL23   | ZNF518A  |
